# Supplementary material for: SpliceVault predicts the precise nature of variant-associated mis-splicing
Source: PubMed Central journal article supplement (PMC9925382; doi:10.1038/s41588-022-01293-8), 2023-02-06

OPHN1

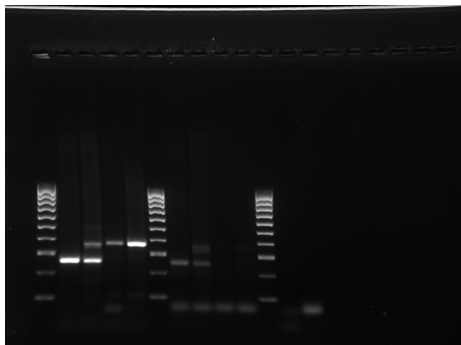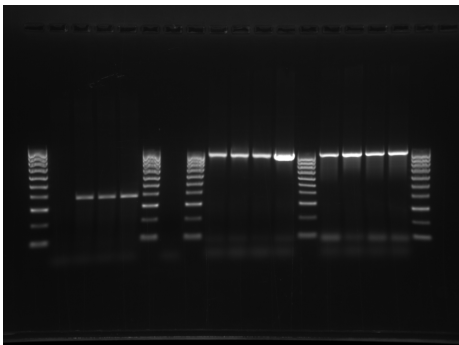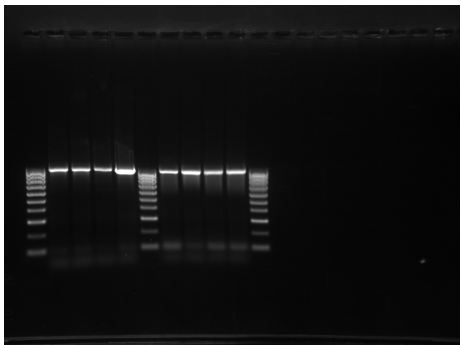

SPG11

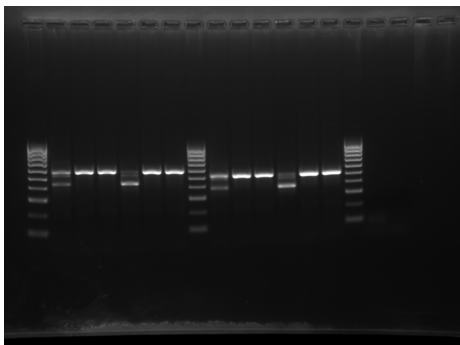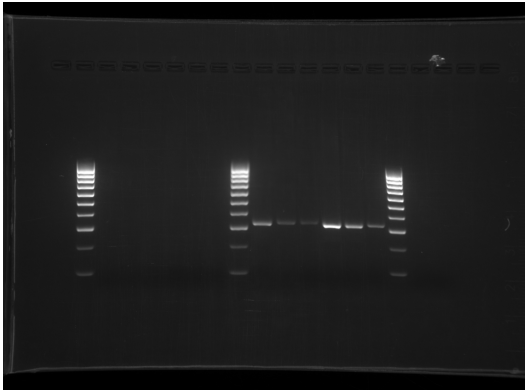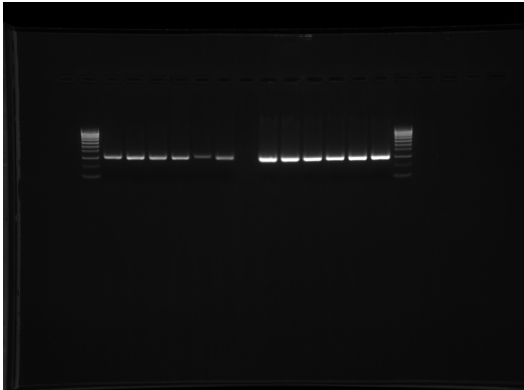

GSDME

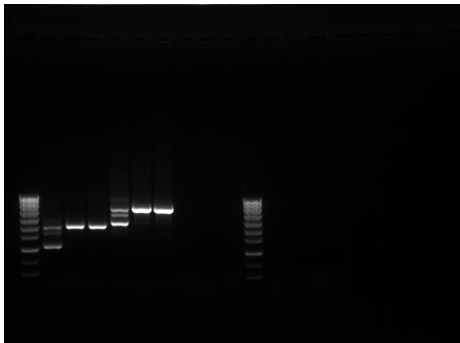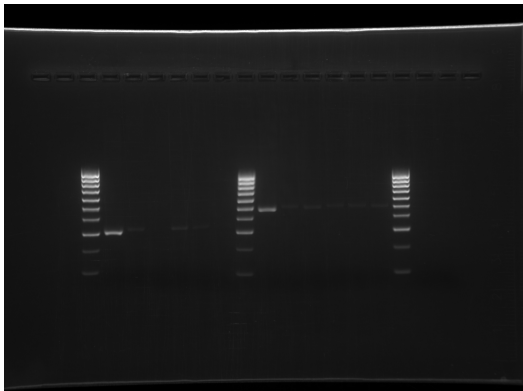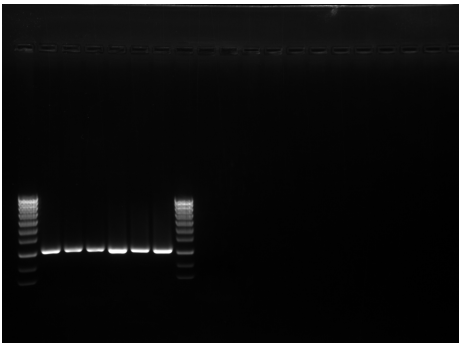

EMD

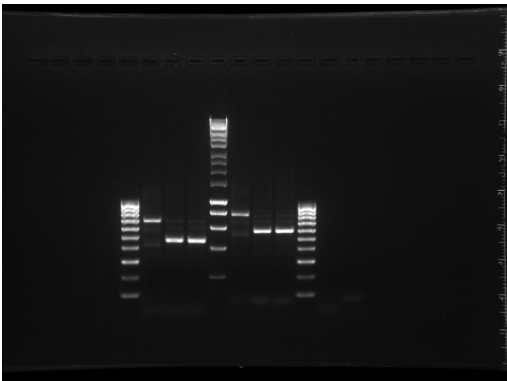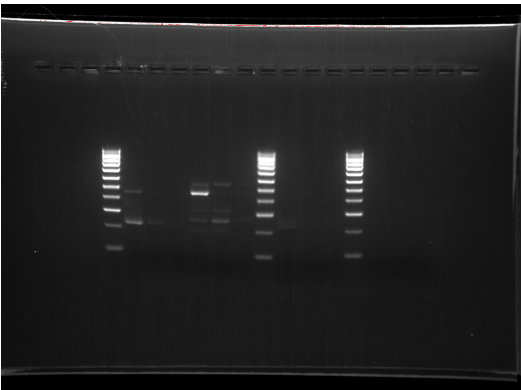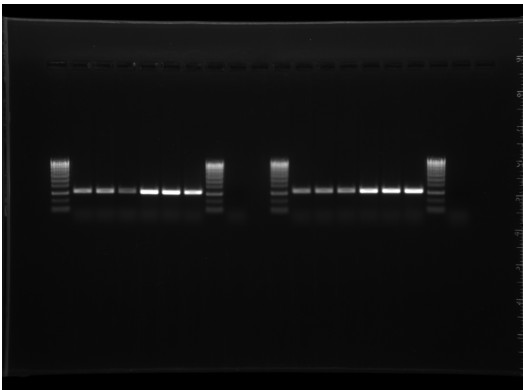

Supplement: 41588_2022_1293_MOESM15_ESM.pdf [file 41588_2022_1293_MOESM15_ESM.pdf]
